# Supplementary material
Source: PubMed Central journal article supplement (PMC4351371)
Supplement: supp_ciu787_ciu787supp.pdf [file supp_ciu787_ciu787supp.pdf]

Supplemental Tables and Figures:

## The *Bacteroides fragilis* toxin gene is prevalent in the colon mucosa of colorectal cancer patients

*Annemarie Boleij*<sup>1†</sup>, *Elizabeth M. Hechenbleikner*<sup>2†</sup>, *Andrew C. Goodwin*<sup>1</sup>, *Ruchi Badani*<sup>4</sup>, *Ellen M. Stein*<sup>1</sup>, *Mark G. Lazarev*<sup>1</sup>, *Brandon Ellis*<sup>3</sup>, *Karen C. Carroll*<sup>3</sup>, *Emilia Albesiano*<sup>1</sup>, *Elizabeth C. Wick*<sup>2</sup>, *Elizabeth Platz*<sup>4,5,6</sup>, *Drew M. Pardoll*<sup>1,4,6</sup>, *Cynthia L. Sears*<sup>1,4,6</sup>

† Annemarie Boleij and Elizabeth Hechenbleikner contributed equally to this manuscript  
Departments of Medicine<sup>1</sup>, Surgery<sup>2</sup>, Pathology<sup>3</sup>, and Oncology<sup>4</sup>, Johns Hopkins University School of Medicine, Baltimore MD, USA  
Department of Epidemiology<sup>5</sup>, Bloomberg School of Public Health, Baltimore, MD, USA  
<sup>6</sup>Sidney Kimmel Comprehensive Cancer Center, Johns Hopkins University School of Medicine, Baltimore, MD USA

Corresponding author: Dr. Cynthia L. Sears

Professor of Medicine and Oncology

1550 Orleans Street

CRB2 Bldg, Suite 1M.05

Baltimore, MD 21231

Tel: 410-614-0141

Fax: 410-614-9775

Email: [csears@jhmi.edu](mailto:csears@jhmi.edu)

Alternate corresponding author: Dr. Annemarie Boleij

Radboud University Medical Center

Geert Grooteplein zuid 10

6500 HB Nijmegen

The Netherlands

Tel: +31 629 477 377

Email: [aboleij@gmail.com](mailto:aboleij@gmail.com)

**Table of contents:**

**Supplemental Table 1:** PCR conditions

**Supplemental Table 2:** Detailed Patient Characteristics A) Cases B) Controls

**Supplemental Figure 1:** Collection of Tumor and Paired Normal Samples from Surgical Specimens

**Supplemental Figure 2:** *Bacteroides* colonies recovered from tumor and normal samples from cases with and without exposure to oral antibiotics

**Supplemental Figure 3:** Number of Single Colonies Tested per Case or Control and per mm<sup>2</sup> of Tissue Sampled

**Supplemental Figure 4:** Consistency of *bft* Status for Tissue Sample Pairs from the Same Case or Control

**Supplemental Figure 5:** Percentage of *bft*-Positive Colonies in Tumor, Normal and Colonoscopy Biopsy Samples

**Supplemental Table 1. PCR conditions**

| PCR            | Primers | Primer sequence      | Product | PCR conditions                                    | Reference |
|----------------|---------|----------------------|---------|---------------------------------------------------|-----------|
| <i>bft</i> 368 | 368F    | GAACCTAAAACGGTATATGT | 368 bp  | 20 cycles (94 °C "30, 62 to 52 °C "30, 72 °C "30) | [22]      |
|                | 368R    | GTTGTAGACATCCCACTGGC |         | 20 cycles (94 °C "30, 52 °C "30, 72 °C "30)       |           |
| <i>bft</i> 281 | 281F    | GCGAACTCGGTTTATGCAGT | 281 bp  | 20 cycles (94 °C "30, 62 to 52 °C "30, 72 °C "30) | [22, 23]  |
|                | 281R    | GTTGTAGACATCCCACTGGC |         | 20 cycles (94 °C "30, 52 °C "30, 72 °C "30)       |           |

Supplemental Table 2A. Detailed Characteristics for Cases

| CRC Patients           |           |     |                  |             |                   |                          |                 |                                      |                |          |          |          |
|------------------------|-----------|-----|------------------|-------------|-------------------|--------------------------|-----------------|--------------------------------------|----------------|----------|----------|----------|
| Patient Identification | Age (yrs) | Sex | Race             | Antibiotics | Bowel Preparation | Tumor Site               | Tumor Size (cm) | Tumor Histology                      | Clinical Stage | T Status | N Status | M Status |
| 3749                   | 39        | M   | Caucasian        | No          | Mechanical prep   | Sigmoid                  | 5.0             | Adenocarcinoma (low grade)           | 3              | 3        | 1        | 0        |
| 3752                   | 73        | F   | Caucasian        | No          | No prep           | Transverse               | 2.5             | Adenocarcinoma (low grade)           | 2              | 3        | 0        | 0        |
| 3753                   | 48        | F   | African American | No          | Mechanical prep   | Ascending                | 4.7             | Adenocarcinoma (low grade)           | 4              | 3        | 0        | 1        |
| 3754                   | 67        | F   | African American | No          | No prep           | Ascending                | 3.0             | Adenocarcinoma (high grade)          | 2              | 3        | 0        | 0        |
| 3755                   | 76        | F   | Caucasian        | No          | No Prep           | Ascending                | 1.5             | Tubular Adenoma (dysplasia)          | na             | na       | na       | na       |
| 3756                   | 54        | M   | Caucasian        | No          | No Prep           | Sigmoid                  | 4.5             | Adenocarcinoma (low grade)           | 4              | 3        | 0        | 1        |
| 3759                   | 87        | F   | Caucasian        | Yes         | Mechanical prep   | Rectum                   | 4.5             | Adenocarcinoma (low grade)           | 4              | 3        | 2        | 1        |
| 3760                   | 29        | F   | Caucasian        | No          | No prep           | Rectosigmoid             | 8.0             | Adenocarcinoma (low grade)           | 2              | 4        | 0        | 0        |
| 3762                   | 73        | M   | Caucasian        | No          | No prep           | Ascending                | 5.4             | Adenocarcinoma (low grade)           | 4              | 4        | 1        | 1        |
| 3763                   | 66        | F   | Caucasian        | No          | No prep           | Ascending                | 3.0             | Adenocarcinoma (low grade)           | 2              | 3        | 0        | 0        |
| 3766                   | 56        | F   | Caucasian        | No          | No prep           | Sigmoid                  | 5.5             | Adenocarcinoma (low grade)           | 4              | 3        | 2        | 1        |
| 3768                   | 45        | M   | African American | Yes         | Mechanical prep   | Transverse               | 4.2             | Adenocarcinoma (low grade)           | 4              | 3        | 2        | 1        |
| 3769                   | 78        | F   | African American | No          | Mechanical prep   | Splenic flexure          | 6.0             | Adenocarcinoma (low grade)           | 3              | 3        | 1        | 0        |
| 3770                   | 70        | M   | Caucasian        | No          | No prep           | Hepatic flexure          | 3.5             | Adenocarcinoma (high grade)          | 1              | 2        | 0        | 0        |
| 3773                   | 58        | F   | African American | Yes         | Mechanical prep   | Cecum                    | 3.5             | Adenocarcinoma (low grade)           | 4              | 3        | 1        | 1        |
| 3774                   | 45        | M   | Asian            | No          | No prep           | Hepatic flexure          | 4.5             | Adenocarcinoma (high grade)          | 2              | 3        | 0        | 0        |
| 3776                   | 84        | F   | Caucasian        | No          | No prep           | Ascending                | 3.5             | Tubular Adenoma (no dysplasia)       | na             | na       | na       | na       |
| 3779A                  | 74        | F   | Caucasian        | Yes         | Mechanical prep   | Sigmoid                  | 4.5             | Adenocarcinoma (low grade)           | 3              | 3        | 1        | 0        |
| 3779B                  | --        | --  | --               | --          | --                | Right colon <sup>a</sup> | 4.2             | Tubulovillous Adenoma (dysplasia)    | na             | na       | na       | na       |
| 3780                   | 78        | F   | Caucasian        | Yes         | Mechanical prep   | Ascending                | 4.0             | Adenocarcinoma (low grade)           | 4              | 3        | 2        | 1        |
| 3781                   | 62        | M   | Caucasian        | Yes         | Mechanical Prep   | Descending               | 4.5             | Adenocarcinoma (low grade)           | 4              | 3        | 1        | 1        |
| 3783                   | 68        | M   | Caucasian        | No          | Mechanical Prep   | Ascending                | 1.1             | Tubular adenoma (dysplasia)          | na             | na       | na       | na       |
| 3784                   | 47        | M   | African American | Yes         | Mechanical Prep   | Descending               | 5.5             | Adenocarcinoma (high grade)          | 2              | 3        | 0        | 0        |
| 3785                   | 54        | F   | Caucasian        | No          | No Prep           | Rectosigmoid             | 4               | Adenocarcinoma (low grade)           | 3              | 3        | 1        | 0        |
| 3786                   | 56        | M   | Caucasian        | Yes         | Mechanical Prep   | Sigmoid                  | 1.0             | Adenocarcinoma <sup>b</sup>          | 4              | 2        | 0        | 1        |
| 3788                   | 52        | M   | Caucasian        | No          | Mechanical Prep   | Rectosigmoid             | 4               | Adenocarcinoma (low grade)           | 4              | 3        | 2        | 1        |
| 3789                   | 55        | M   | Hispanic         | No          | No Prep           | Descending               | 5.0             | Adenocarcinoma (low grade)           | 3              | 3        | 1        | 0        |
| 3972                   | 78        | M   | Caucasian        | No          | No Prep           | Cecum                    | 4               | Adenocarcinoma (high grade)          | 3              | 4        | 2        | 0        |
| 3976                   | 52        | F   | Caucasian        | No          | No Prep           | Transverse               | 2.0             | Adenocarcinoma (low grade)           | 1              | 2        | 0        | 0        |
| 3977                   | 38        | F   | Caucasian        | No          | No Prep           | Sigmoid                  | 5               | Adenocarcinoma (low grade)           | 1              | 2        | 0        | 0        |
| 3978                   | 90        | F   | Caucasian        | No          | No Prep           | Rectum                   | 2.7             | Adenocarcinoma (low grade)           | 1              | 2        | 0        | 0        |
| 3979                   | 77        | F   | African American | No          | Mechanical Prep   | Cecum                    | 3.5             | Adenocarcinoma (low grade)           | 3              | 3        | 1        | 0        |
| 3982                   | 62        | M   | Caucasian        | No          | No prep           | Ascending                | 4.5             | Adenocarcinoma (low grade)           | 2              | 4        | 0        | 0        |
| 3984                   | 85        | M   | Caucasian        | Yes         | Mechanical Prep   | Ascending                | 3.3             | Tubular adenoma (no dysplasia)       | na             | na       | na       | na       |
| 3986                   | 59        | M   | Caucasian        | Yes         | Mechanical Prep   | Ascending                | 5.0             | Adenocarcinoma (low grade)           | 2              | 3        | 0        | 0        |
| 3987                   | 66        | F   | Caucasian        | Yes         | Mechanical Prep   | Ascending                | 5               | Adenocarcinoma (low grade)           | 2              | 3        | 0        | 0        |
| 3988                   | 48        | M   | Caucasian        | Yes         | Mechanical Prep   | Descending               | 3.5             | Adenocarcinoma (low grade)           | 1              | 2        | 0        | 0        |
| 3989                   | 41        | F   | Caucasian        | Yes         | Mechanical Prep   | Cecum                    | 8.5             | Adenocarcinoma (low grade)           | 4              | 3        | 1        | 1        |
| 3990                   | 61        | F   | Caucasian        | Yes         | Mechanical Prep   | Ascending                | 3.0             | Adenocarcinoma (low grade)           | 1              | 2        | 0        | 0        |
| 3991                   | 70        | M   | Caucasian        | Yes         | Mechanical Prep   | Ascending                | 3.1             | Tubular adenoma (dysplasia)          | na             | na       | na       | na       |
| 3992                   | 91        | F   | Caucasian        | No          | No prep           | Splenic Flexure          | 4.5             | Adenocarcinoma (high grade)          | 2              | 3        | 0        | 0        |
| 3994                   | 82        | F   | Caucasian        | Yes         | Mechanical Prep   | Ascending                | 3               | Adenocarcinoma (low grade)           | 2              | 2        | 0        | 0        |
| 3996                   | 67        | F   | Caucasian        | Yes         | Mechanical Prep   | Ascending                | 2.0             | Adenocarcinoma (low grade)           | 1              | 2        | 0        | 0        |
| 3997                   | 28        | F   | Asian            | Yes         | Mechanical Prep   | Descending               | 6.3             | Adenocarcinoma (high grade)          | 4              | 3        | 2        | 1        |
| 3998                   | 78        | F   | Caucasian        | Yes         | Mechanical Prep   | Cecum                    | 7.2             | Adenocarcinoma (low grade)           | 2              | 3        | 0        | 0        |
| 3999A                  | 59        | M   | Caucasian        | Yes         | Mechanical Prep   | Ascending                | 10              | Tubulovillous adenoma (no dysplasia) | na             | na       | na       | na       |
| 3999B                  | --        | --  | --               | --          | --                | Sigmoid                  | 6.5             | Tubulovillous adenoma (no dysplasia) | na             | na       | na       | na       |
| 4002                   | 85        | F   | Caucasian        | Yes         | Mechanical Prep   | Sigmoid                  | 4.5             | Adenocarcinoma (low grade)           | 3              | 2        | 2        | 0        |
| 4003                   | 71        | M   | African American | Yes         | Mechanical Prep   | Hepatic Flexure          | 8.0             | Adenocarcinoma (low grade)           | 3              | 3        | 2        | 0        |
| 4008                   | 48        | M   | Caucasian        | Yes         | Mechanical Prep   | Cecum                    | 6.5             | Adenocarcinoma (high grade)          | 3              | 4        | 2        | 0        |
| 4009                   | 53        | M   | Caucasian        | No          | No prep           | Rectosigmoid             | 8.6             | Adenocarcinoma (low grade)           | 3              | 4        | 1        | 0        |

<sup>a</sup>pathology report did not report a tumor site

<sup>b</sup>low and/or high grade

yrs = years, Mechanical bowel preparation = Polyethylene glycol and/or phosphate enema

**Supplemental Table 2B. Detailed Characteristics for Controls**

| Patient Identification | Age (yrs) | Sex | Race             | Antibiotics | Antibiotic History Details       | Bowel Preparation <sup>a</sup> | Reason for Colonoscopy  | Biopsy Sites | Gross Colonoscopy Findings                |
|------------------------|-----------|-----|------------------|-------------|----------------------------------|--------------------------------|-------------------------|--------------|-------------------------------------------|
| S1                     | 51        | F   | African American | NA          | NA                               | GoLYTELY                       | Screening               | Left only    | Polyps <sup>c</sup>                       |
| S2                     | 66        | F   | Caucasian        | NA          | NA                               | GoLYTELY                       | Workup (Diarrhea)       | Left, Right  | Polyps, Diverticulosis                    |
| S3                     | 66        | M   | African American | NA          | NA                               | GoLYTELY                       | Screening               | Left, Right  | Polyp, Diverticulosis                     |
| S4                     | 66        | M   | African American | NA          | NA                               | GoLYTELY                       | Workup (Anemia)         | Left, Right  | Diverticulosis                            |
| S5                     | 44        | F   | Caucasian        | NA          | NA                               | GoLYTELY                       | Workup (Diarrhea)       | Left, Right  | Polyp, Diverticulosis                     |
| S6                     | 52        | F   | Caucasian        | NA          | NA                               | GoLYTELY                       | Screening               | Left, Right  | Normal                                    |
| S7                     | 74        | M   | Caucasian        | No          | NA                               | MiraLAX                        | Screening               | Left, Right  | Normal                                    |
| S8                     | 51        | F   | African American | No          | NA                               | GoLYTELY & MiraLAX             | Screening               | Left, Right  | Polyps <sup>c</sup>                       |
| S9                     | 73        | M   | African American | No          | NA                               | GoLYTELY                       | Screening               | Left, Right  | Polyps <sup>c</sup>                       |
| S10                    | 40        | F   | Caucasian        | No          | NA                               | GoLYTELY                       | Workup (Anemia)         | Left only    | Normal                                    |
| S11                    | 42        | F   | Hispanic         | No          | NA                               | GoLYTELY                       | Workup (Constipation)   | Left only    | Normal                                    |
| S12                    | 43        | F   | Caucasian        | No          | NA                               | MiraLAX                        | Workup (Abdominal pain) | Left, Right  | Polyp <sup>c</sup>                        |
| S13                    | 62        | M   | African American | No          | NA                               | GoLYTELY                       | Screening               | Left, Right  | Possible arteriovenous malformation       |
| S14                    | 75        | M   | Caucasian        | Yes         | PCN, past 6 mo                   | GaviLyte Prep                  | Workup (Diarrhea)       | Left, Right  | Polyps <sup>c</sup> , Radiation Proctitis |
| S15                    | 44        | M   | Caucasian        | No          | NA                               | MiraLAX                        | Screening               | Left, Right  | Polyps <sup>c</sup> , Diverticulosis      |
| S17                    | 71        | F   | African American | Yes         | PCN, current                     | GoLYTELY                       | Screening               | Left, Right  | Normal                                    |
| S18                    | 74        | F   | African American | No          | NA                               | NuLYTELY                       | Screening               | Left, Right  | Normal                                    |
| S19                    | 62        | M   | African American | No          | NA                               | GoLYTELY                       | Screening               | Left, Right  | Normal                                    |
| S20                    | 59        | M   | African American | No          | NA                               | GoLYTELY                       | Screening               | Left, Right  | Normal                                    |
| S21                    | 49        | F   | Asian            | Yes         | FQ, past 3 mo                    | NuLYTELY                       | Workup (Constipation)   | Left, Right  | Polyp <sup>c</sup>                        |
| S22                    | 47        | M   | African American | Yes         | Unknown <sup>b</sup> , past 3 mo | GoLYTELY                       | Workup (Anemia)         | Left, Right  | Diverticulosis                            |
| S23                    | 78        | F   | Caucasian        | No          | NA                               | Mag Citrate & Bisacodyl        | Workup (Abdominal pain) | Left, Right  | Diverticulosis                            |
| S24                    | 47        | M   | African American | No          | NA                               | MiraLAX                        | Workup (Abdominal pain) | Left, Right  | Diverticulosis                            |
| S25                    | 63        | M   | African American | No          | NA                               | GoLYTELY                       | Screening               | Left, Right  | Polyp                                     |
| S26                    | 39        | F   | African American | Yes         | Unknown <sup>b</sup> , past 3 mo | MiraLAX                        | Workup (Constipation)   | Left, Right  | Normal                                    |
| S27                    | 51        | F   | African American | Yes         | FQ, PCN & FLZ, past 3 mo         | GoLYTELY                       | Screening               | Left, Right  | Polyp                                     |
| S28                    | 47        | F   | Caucasian        | No          | NA                               | MiraLAX                        | Screening               | Left, Right  | Normal                                    |
| S29                    | 64        | F   | Caucasian        | No          | NA                               | GoLYTELY                       | Workup (Constipation)   | Left, Right  | Diverticulosis                            |
| S31                    | 65        | M   | African American | Yes         | Unknown <sup>b</sup> , past 6 mo | MiraLAX                        | Workup (Blood in stool) | Left, Right  | Diverticulosis, Hemorrhoids               |
| S32                    | 92        | F   | Caucasian        | Yes         | DOXY, past 3 mo                  | MiraLAX                        | Workup (Abdominal pain) | Left only    | Diverticulosis, Polyp                     |
| S33                    | 58        | F   | African American | No          | NA                               | MiraLAX                        | Screening               | Left, Right  | Normal                                    |
| S34                    | 36        | M   | Asian            | Yes         | DOXY, past 12 mo                 | MiraLAX                        | Screening               | Left, Right  | Normal                                    |
| S35                    | 66        | F   | Caucasian        | No          | NA                               | MiraLAX                        | Screening               | Left, Right  | Diverticulosis                            |
| S36                    | 60        | F   | Caucasian        | No          | NA                               | MiraLAX                        | Screening               | Left, Right  | Normal                                    |
| S37                    | 79        | F   | African American | No          | NA                               | GoLYTELY                       | Screening               | Left, Right  | Diverticulosis                            |
| S38                    | 66        | M   | Caucasian        | No          | NA                               | MiraLAX                        | Screening               | Left, Right  | Diverticulosis                            |
| S39                    | 59        | M   | Caucasian        | No          | NA                               | MiraLAX                        | Screening               | Left, Right  | Polyps <sup>c</sup>                       |
| S40                    | 72        | F   | African American | No          | NA                               | MiraLAX                        | Screening               | Left, Right  | Polyps <sup>c</sup>                       |
| S41                    | 58        | F   | African American | No          | NA                               | GoLYTELY                       | Screening               | Left, Right  | Polyps <sup>c</sup>                       |
| S42                    | 46        | F   | Asian            | No          | NA                               | GoLYTELY                       | Workup (Blood in stool) | Left, Right  | Normal                                    |
| S43                    | 69        | M   | African American | No          | NA                               | MiraLAX                        | Screening               | Left, Right  | Polyps                                    |
| S44                    | 62        | F   | African American | No          | NA                               | GoLYTELY                       | Workup (+FOBT)          | Left, Right  | Diverticulosis, Polyps                    |
| S45                    | 47        | F   | Caucasian        | Yes         | Unknown <sup>b</sup> , past 3 mo | GoLYTELY                       | Workup (Diarrhea)       | Left, Right  | Normal                                    |
| S46                    | 73        | M   | African American | No          | NA                               | GoLYTELY                       | Screening               | Left, Right  | Diverticulosis, Polyps <sup>c</sup>       |
| S47                    | 63        | F   | African American | Yes         | FQ, past 3 mo                    | GoLYTELY                       | Workup (Melena)         | Left, Right  | Normal                                    |
| S48                    | 66        | M   | Caucasian        | No          | NA                               | MiraLAX                        | Screening               | Left, Right  | Polyps                                    |
| S49                    | 56        | F   | African American | No          | NA                               | GaviLyte                       | Screening               | Left, Right  | Normal                                    |
| S50                    | 63        | F   | African American | Yes         | FQ & MTZ, current                | GoLYTELY                       | Screening               | Left, Right  | Inadequate prep                           |
| S51                    | 64        | M   | Other            | No          | NA                               | GoLYTELY                       | Screening               | Left, Right  | Normal                                    |

<sup>a</sup>Bowel preparation included Polyethylene glycol (PEG) with electrolyte additives (GoLYTELY®, GaviLyte®, NuLYTELY®), PEG without electrolyte additives (MiraLAX®), saline laxative (magnesium citrate) and stimulant laxative (Bisacodyl)

<sup>b</sup>Could not recall type of antibiotic taken

<sup>c</sup>11 had tubular adenomas removed at the time of their procedure, all other polyps were either hyperplastic or inflammatory polyps

yrs = years, mo = month, NA = not applicable, PCN = penicillin, FQ = Fluoroquinolone, FLZ = Fluconazole, DOXY = doxycycline, MTZ = Metronidazole

**Supplemental Figure 1. Collection of Tumor and Paired Normal Samples from Surgical Specimens**

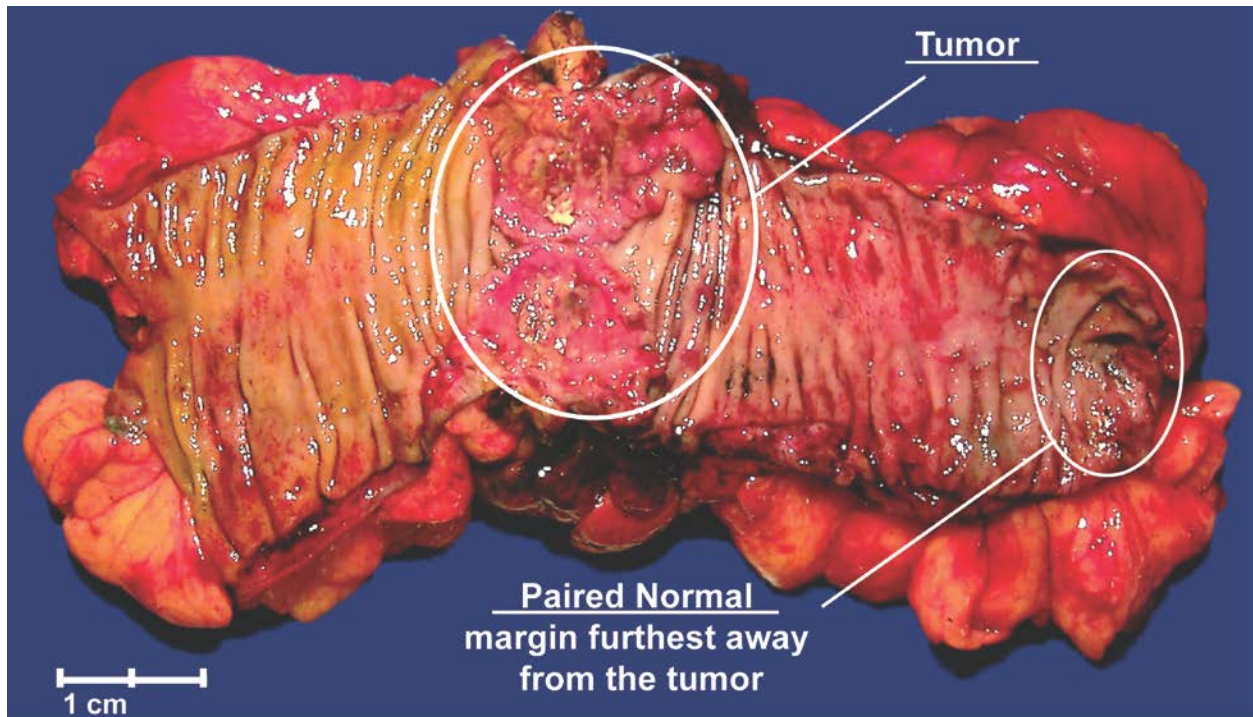

Entire specimen is roughly 23 centimeters in length. Tumor site is indicated. Normal tissue was routinely collected from a site on the specimen most distant from the tumor.

Supplemental Figure 2. *Bacteroides* colonies recovered from tumor and normal samples from cases with and without exposure to oral antibiotics

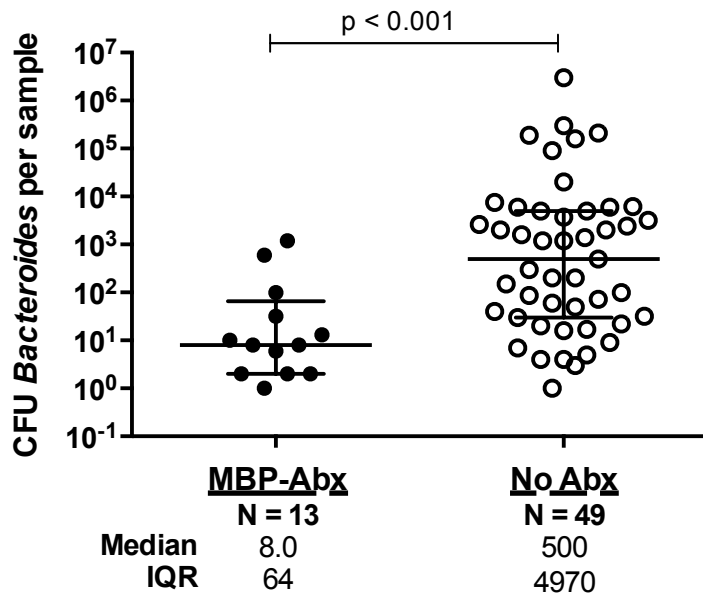

Of 44 tissue samples from 23 MBP-Abx cases, 13 tissue samples (8 tumors, 5 normal tissues) grew colonies on BBE. Of 49 tissue samples from 26 No Abx cases, 49 tissue samples (24 tumor samples, 25 normal tissues) grew colonies on BBE. Oral antibiotic exposure as part of the mechanical bowel preparation prior to surgery significantly decreased recovered *Bacteroides* CFUs ( $p < 0.001$ ). MBP-Abx = mechanical bowel preparation with oral antibiotics, No Abx = no preoperative bowel preparation or mechanical bowel preparation without oral antibiotics, CFU = colony forming units

Supplemental Figure 3. Number of Single Colonies Tested per Case or Control and per mm<sup>2</sup> of Tissue Sampled

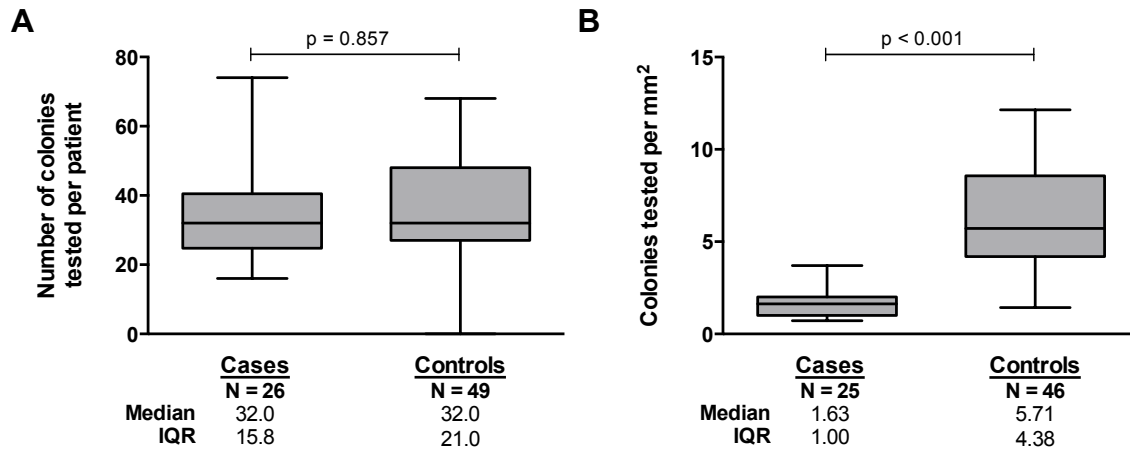

**Box whisker plots of number of colonies analyzed per case or control and per mm<sup>2</sup> tissue** A) There was no difference in the number of colonies tested when No Abx cases were compared to all controls (Mann-Whitney U test; p=0.857). B) When the number of colonies tested per No Abx case or control was corrected for tissue size sampled, the number of colonies tested per mm<sup>2</sup> of tissue was significantly lower in No Abx cases compared to controls (Mann-Whitney U test; p<0.001). One No Abx case had an unknown biopsy size and was excluded. 3 controls had no growth and were also excluded. IQR = Interquartile range



Supplemental Figure 4. Consistency of *bft* Status for Tissue Sample Pairs from the Same Case or Control

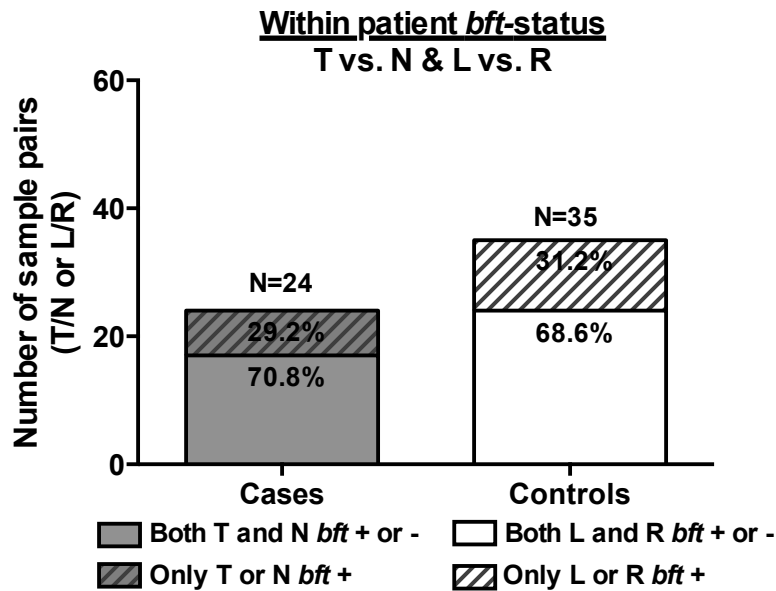

Consistency of *bft* status within cases and controls. *bft* status was analyzed by paired tumor (T) and normal (N) samples from the same case or left (L) and right (R) biopsy pairs from the same control. Tissue pairs (T/N or L/R) were processed using the direct single colony method to determine consistency between paired samples (see Materials and Methods). A total of 24 T/N sample pairs from 26 No Abx cases revealed that 17/24 pairs (70.8%) had consistent *bft* results (13 pairs both *bft*-positive and 4 pairs both *bft*-negative). In 4/24 sample pairs (16.7%), N was *bft*-negative while T was *bft*-positive; in 3/24 sample pairs (12.5%), N was *bft*-positive while T was *bft*-negative. A total of 35 L/R pairs from 45 controls demonstrated consistent *bft* results in 24/35 samples pairs (68.6%) while in 11/35 biopsy pairs (31.2%) only the L or R biopsy was *bft*-positive.  
N = normal tissue; T = tumor tissue; Ctrl = controls

Supplemental Figure 5. Median Percentage of *bft*-Positive Colonies in Tumor, Normal and Colonoscopy Biopsy Samples

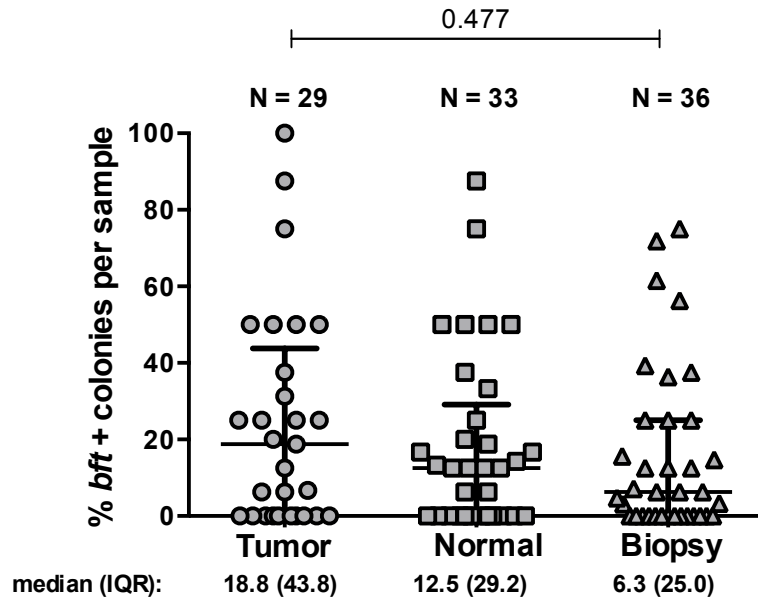

**Number of *bft* positive colonies per tissue sample analyzed.** For all cases with growth on BBE plates, a total of 29 tumor samples (5 adenomas, 52 adenocarcinomas) and 33 normal tissues were analyzed. A total of 36 biopsies were analyzed from colonoscopy controls. The percentage of *bft*+ colonies was higher in tumors compared to normal tissues and biopsies from controls (Kruskal-Wallis;  $p=0.477$ ). Tissues were analyzed by the direct single colony method. IQR = Interquartile range
